# Supplementary material for: Staphylococcus aureus in Intensive Pig Production in South Africa: Antibiotic Resistance, Virulence Determinants, and Clonality
Source: PubMed Central journal article supplement (PMC8000748; doi:10.3390/pathogens10030317), 2021-03-08
Supplement: pathogens-10-00317-s001.pdf [file pathogens-10-00317-s001.pdf]

Supplementary materials

# ***Staphylococcus aureus* in intensive pig production in South Africa: antibiotic resistance, virulence determinants, and clonality**

Ncomeka Sineke <sup>1</sup>, Jonathan Asante <sup>1</sup>, Daniel Gyamfi Amoako <sup>1,2,3,\*</sup>, Akebe Luther King Abia <sup>1,\*</sup>, Keith Perrett <sup>4</sup>, Linda A. Bester <sup>2</sup> and Sabiha Y. Essack <sup>1</sup>

- <sup>1</sup> Antimicrobial Research Unit, College of Health Sciences, University of KwaZulu-Natal, Durban 4000, South Africa; [nsineje@gmail.com](mailto:nsineje@gmail.com) (N.S.); [josante33@yahoo.com](mailto:josante33@yahoo.com) (J.A.); [lutherkinga@yahoo.fr](mailto:lutherkinga@yahoo.fr) (A.L.K.A.); [amoakodg@gmail.com](mailto:amoakodg@gmail.com) (D.G.A.); [essacks@ukzn.ac.za](mailto:essacks@ukzn.ac.za) (S.Y.E.)
  - <sup>2</sup> Biomedical Resource Unit, College of Health Sciences, University of KwaZulu-Natal, Durban 4000, South Africa; [besterl@ukzn.ac.za](mailto:besterl@ukzn.ac.za) (L.A.B.)
  - <sup>3</sup> Centre for Respiratory Diseases and Meningitis, National Institute for Communicable Diseases, Johannesburg 2131, South Africa
  - <sup>4</sup> Epidemiology Section, KwaZulu-Natal Agriculture & Rural Development-Veterinary Service, Pietermaritzburg 3201, South Africa; [keith.perrett@kzndard.gov.za](mailto:keith.perrett@kzndard.gov.za) (K.P.)
- \* Correspondence: [amoakodg@gmail.com](mailto:amoakodg@gmail.com) (D.G.A.), Tel.: +27(0)843308957; ORCID: 000-0003-3551-3458; [lutherkinga@yahoo.fr](mailto:lutherkinga@yahoo.fr) (A.L.K.A.), Tel.: +27(0)734403343, ORCID: 000-0002-5194-2810

**Table S1:** Multidrug resistance profiles of *S. aureus* isolates.

| MDR PATTERN                                                                  | Frequency |
|------------------------------------------------------------------------------|-----------|
| LZD-FOX-RIF-ERY-AMK-GENT-TIG-CLI-AMP-PEN-SXT-CIP-MXF-LVX-TET-DOX-NIT-CHL-TEC | 1         |
| LZD-FOX-RIF-ERY-CLI-GENT-AMP-PENG-SXT-MXF-TET-DOX-NIT-CHL-VAN-TEC            | 2         |
| LZD-FOX-RIF-ERY-CLI-GENT-AMP-PEN-SXT-MXF-TET-DOX-NIT-CHL-VAN-TEC             | 1         |
| LZD-FOX-RIF-ERY-CLI-AMP-PEN-SXT-MXF-TET-DOX-NIT-CHL-VAN-TEC                  | 6         |
| LZD-FOX-RIF-ERY-CLI-AMP-PEN-SXT-CIP-MXF-TET-DOX-NIT-CHL-VAN-TEC              | 1         |
| LZD-RIF-ERY-CLI-GENT-TIG-AMP-PEN-MFX-DOX-TET-SXT-CHL-NIT-VAN-TEC             | 1         |
| LZD-FOX-RIF-ERY-CLI-GENT-TIG-AMP-PEN-DOX-TET-SXT-CHL-NIT-VAN-TEC             | 1         |
| LZD-RIF-ERY-GENT-CLI-AMP-PEN-DOX-TET-SXT-CIP-MXF-LVX-NIT-CHL-VAN-TEC         | 1         |
| LZD-FOX-RIF-ERY-TIG-CLI-AMP-PEN-DOX-TET-CHL-SXT-NIT-VAN-TEC                  | 1         |
| FOX-RIF-ERY-AMK-GENT-CLI-PEN-DOX-TET-SXT-CIP-MXF-LVX-CHL-VAN                 | 1         |
| LZD-RIF-ERY-CLI-AMP-PEN-SXT-MXF-TET-DOX-NIT-CHL-VAN-TEC                      | 2         |
| LZD-RIF-ERY-CLI-AMP-PEN-SXT-MXF-TET-DOX-NIT-CHL-VAN-TEC                      | 8         |
| LZD-FOX-RIF-ERY-CLI-TIG-TET-DOX-AMP-PEN-SXT-MXF-CHL-VAN-TEC                  | 1         |
| LZD-RIF-ERY-CLI-AMP-PEN-SXT-MXF-TET-DOX-NIT-CHL-VAN-TEC                      | 1         |
| LZD-RIF-ERY-GENT-CLI-AMP-PEN-DOX-TET-CHL-SXT-NIT-VAN-TEC                     | 1         |
| LZD-FOX-RIF-ERY-CLI-AMP-PEN-DOX-TET-SXT-NIT-CHL-TEC                          | 1         |
| LZD-FOX-RIF-ERY-CLI-TIG-AMP-PEN-SXT-TET-DOX-NIT-CHL-TEC                      | 1         |
| LZD-RIF-ERY-CLI-TIG-AMP-PEN-DOX-TET-SXT-MXF-CHL-NIT-VAN-TEC                  | 1         |
| LZD-RIF-ERY-CLI-PEN-SXT-TET-DOX-NIT-CHL-TEC                                  | 1         |
| LZD-FOX-RIF-ERY-CLI-TIG-AMP-PEN-SXT-TET-DOX-NIT-VAN-TEC                      | 1         |
| LZD-RIF-ERY-CLI-AMP-PEN-SXT-TET-DOX-NIT-CHL-VAN-TEC                          | 7         |
| LZD-RIF-ERY-CLI-AMP-PEN-SXT-TET-DOX-NIT-CHL-TEC                              | 1         |
| LZD-FOX-RIF-ERY-CLI-GENT-AMP-PEN-SXT-MXF-CIP-LVX-CHL-VAN-TEC                 | 1         |
| LZD-RIF-ERY-CLI-TIG-AMP-PEN-SXT-TET-DOX-NIT-CHL-VAN-TEC                      | 1         |
| LZD-RIF-ERY-CLI-AMP-PEN-SXT-MXF-TET-DOX-VAN-TEC                              | 1         |
| RIF-ERY-CLI-AMP-PEN-SXT-TET-DOX-CHL-TEC                                      | 1         |
| LZD-FOX-RIF-ERY-CLI-PEN-MXF-DOX-VAN-TEC                                      | 1         |
| LZD-RIF-ERY-CLI-AMP-PEN-TET-DOX-NIT-CHL-VAN-TEC                              | 2         |
| LZD-RIF-ERY-CLI-AMP-PEN-TET-DOX-NIT-CHL-TEC                                  | 1         |
| LZD-RIF-ERY-CLI-PEN-SXT-TET-DOX-VAN-TEC                                      | 1         |
| LZD-FOX-RIF-ERY-CLI-PEN-NIT-VAN-TEC                                          | 1         |
| RIF-ERY-CLI-PEN-DOX-TET-CHL-VAN                                              | 1         |
| ERY-CLI-PEN-TET-LVX-VAN                                                      | 1         |
| ERY-CLI-PEN-SXT-TET-DOX-VAN                                                  | 1         |
| RIF-ERY-CLI-PEN-TET-DOX-VAN                                                  | 2         |
| ERY-CLI-AMP-PEN-TET-DOX-CHL-VAN                                              | 1         |
| ERY-CLI-AMP-PEN-SXT-TET-DOX-CHL                                              | 1         |
| ERY-CLI-AMP-PEN-SXT-TET-DOX-TEC                                              | 1         |
| ERY-CLI-PEN-SXT-TET-DOX-VAN                                                  | 1         |
| ERY-CLI-AMP-SXT-TET-DOX                                                      | 1         |
| ERY-CLI-PEN-TET-DOX-VAN                                                      | 2         |
| ERY-CLI-AMP-PEN-SXT-TET-DOX                                                  | 1         |

|                                 |   |
|---------------------------------|---|
| LZD-ERY-CLI-TET-VAN             | 1 |
| RIF-ERY-PEN-TET-DOX             | 1 |
| ERY-CLI-DOX-TET-SXT-NIT         | 1 |
| ERY-CLI-AMP-PEN-SXT-TET-DOX-VAN | 1 |
| ERY-CLI-DOX-TET-SXT             | 1 |
| ERY-CLI-TET-VAN                 | 1 |
| ERY-CLI-DOX-TET-SXT             | 1 |
| ERY-CLI-AMP-PEN-DOX-TET         | 1 |
| CLI-PEN-TET-DOX                 | 1 |
| ERY-CLI-TET-VAN                 | 1 |
| ERY-CLI-DOX-TET-VAN             | 2 |
| AMP-PEN-SXT-VAN                 | 1 |
| ERY-CLI-PEN-SXT                 | 1 |
| ERY-CLI-TET-DOX-VAN             | 1 |

**Table S2:** List of primers used to detect antibiotic resistance and virulence gene.

| Gene                    | Primer/sequence                                                 | PCR conditions                         | PCR size (bp) | Reference                       |
|-------------------------|-----------------------------------------------------------------|----------------------------------------|---------------|---------------------------------|
| <b>Resistance</b>       |                                                                 |                                        |               |                                 |
| <i>mecA</i>             | F-AACAGGTGAATTATTAGCACTTGTAAG<br>R-ATTGCTGTTAATATTTTTGAGTTGAA   | 30 s 94 °C, 30 s 55 °C, 1 min<br>72 °C | 174           | (Kuntova et al., 2012)          |
| <i>blaZ</i>             | F-ACTTCAACACCTGCTGCTTT<br>R-TGACCACTTTTATCAGCAAC                | 30 s 94 °C, 30 s 55 °C, 1 min<br>72 °C | 173           | (Kuntova et al., 2012)          |
| <i>ermC</i>             | F-CTTGTTGATCAGGATAATTTCC<br>R-ATCTTTTAGCAAACCCGTATTC            | 30 s 94 °C, 30 s 55 °C, 1 min<br>72 °C | 190           | (Kuntova et al., 2012)          |
| <i>aac(6')-aph(2'')</i> | F-TAATCCAAGAGCAATAAGGGC<br>R-GCCACACTATCATAACCACTA              | 30 s 94 °C, 30 s 55 °C, 1 min<br>72 °C | 227           | (Kuntova et al., 2012)          |
| <i>msrA</i>             | F-TCCAATCATAGCACAAAATC<br>R-AATTAATATATTTGGTCGT                 | 30 s 94 °C, 30 s 55 °C, 1 min<br>72 °C | 163           | (Kuntova et al., 2012)          |
| <i>tetK</i>             | F-TCGATAGGAACAGCAGTA<br>R-CAGCAGATCCTACTCCTT                    | 30 s 94 °C, 30 s 55 °C, 1 min<br>72 °C | 169           | (Kuntova et al., 2012)          |
| <i>tetM</i>             | F-AGTGGAGCGATTACAGAA<br>R-CATATGTCCTGGCGTGTCTA                  | 30 s 94 °C, 30 s 55 °C, 1 min<br>72    | 158           | (Kuntova et al., 2012)          |
| <b>Virulence</b>        |                                                                 |                                        |               |                                 |
| <i>Hla</i>              | F-CTGATTACTATCCAAGAAATTCGATTG<br>R-CTTTCCAGCCTACTTTTTATCAGT     | 30 s 95 °C, 45 s 58 °C, 1 min<br>72 °C | 209           | (Hoseini Alfatemi et al., 2014) |
| <i>Hld</i>              | FAAGAATTTTTATCTTAATTAAGGAAGGAGTG<br>R-TTAGTGAATTTGTTCACTGTGTCGA | 30 s 95 °C, 45 s 58 °C, 1 min<br>72 °C | 111           | (Hoseini Alfatemi et al., 2014) |
| <i>Eta</i>              | F-GCAGGTGTTGATTTAGCATT<br>R-AGATGTCCTATTTTTGCTG                 | 30 s 95 °C, 45 s 54 °C, 1 min<br>72 °C | 93            | (Hoseini Alfatemi et al., 2014) |
| <i>Etb</i>              | F-ACAAGCAAAAGAATACAGCG<br>R-GTTTTTGGCTGCTTCTCTTG                | 30 s 95 °C, 45 s 54 °C, 1 min<br>72 °C | 226           | (Hoseini Alfatemi et al., 2014) |

|                  |                                                                                    |                                        |     |                                 |
|------------------|------------------------------------------------------------------------------------|----------------------------------------|-----|---------------------------------|
| <i>Sea</i>       | <b>F-GGTTATCAATGTGCGGGTGG</b><br><b>R-CGGCACTTTTTTCTCTTCGG</b>                     | 30 s 94 °C, 30 s 55 °C, 1 min<br>72 °C | 102 | (Hoseini Alfatemi et al., 2014) |
| <i>Seb</i>       | <b>F-GTATGGTGGTGTAACTGAGC</b><br><b>R-CCAAATAGTGACGAGTTAGG</b>                     | 30 s 94 °C, 30 s 55 °C, 1 min<br>72 °C | 164 | (Hoseini Alfatemi et al., 2014) |
| <i>Sed</i>       | <b>F-CCAATAATAGGAGAAAATAAAAG</b><br><b>R-ATTGGTATTTTTTTCGTTC</b>                   | 30 s 94 °C, 30 s 55 °C, 1 min<br>72 °C | 278 | (Hoseini Alfatemi et al., 2014) |
| <i>Tst</i>       | <b>F-ACCCCTGTTCCCTTATCATC</b><br><b>R-TTTTCAGTATTGTAAACGCC</b>                     | 30 s 94 °C, 30 s 60 °C, 1 min<br>72 °C | 326 | (Hoseini Alfatemi et al., 2014) |
| <i>LukS/F-PV</i> | <b>F-ATCATTAGGTA AAAATGTCTGGACATGATCCA</b><br><b>R-GCATCAAGTGATTGGATAGCAA AAGC</b> | 30 s 95 °C, 45 s 60 °C, 1 min<br>72 °C | 443 | (Hoseini Alfatemi et al., 2014) |
